# Supplementary material for: Development of Dipeptide N–acetyl–L–cysteine Loaded Nanostructured Carriers Based on Inorganic Layered Hydroxides
Source: MDPI journal article supplement (doi:10.3390/pharmaceutics15030955), 2023-03-15
Supplement: s1 [file s1]

# Development of dipeptide N-acetyl-L-cysteine loaded nanostructured carriers based on inorganic layered hydroxides

Denise Eulálio,<sup>1</sup> Mariana Pires Figueiredo,<sup>1</sup> Christine Taviot-Gueho,<sup>2,3</sup> Fabrice Leroux,<sup>2,3</sup> Cristina Helena dos Reis Serra,<sup>4</sup> Dalva Lúcia Araújo de Faria<sup>1</sup> and Vera Regina Leopoldo Constantino<sup>1\*</sup>

<sup>1</sup> Departamento de Química Fundamental, Instituto de Química, Universidade de São Paulo - USP, Av. Prof. Lineu Prestes 748, CEP 05508-000, São Paulo, SP, Brazil.

<sup>2</sup> Université Clermont Auvergne, Institut de Chimie de Clermont-Ferrand, BP 10448, F-63000 Clermont-Ferrand, France.

<sup>3</sup> CNRS, UMR 6296, ICCF, F-63178 Aubiere, France.

<sup>4</sup> Departamento de Farmácia, Faculdade de Ciências Farmacêuticas, Universidade de São Paulo - USP, Av. Prof. Lineu Prestes 580, CEP 05508-000, São Paulo, SP, Brazil.

\* Correspondence: vrlconst@iq.usp.br (V.R.L.C.); Tel.: +55 (11) 3091-9152

## Content

1. XRD patterns of LDH-NAC samples and NAC polymorphs
2. Crystal structure of NAC polymorphs obtained by XRD
3. Speciation curves for NAC species relative to pH value
4. FTIR and FT-Raman spectra of NAC samples obtained by freeze-drying of solutions in different pH values
5. Thermal analysis data of NAC and NAC-pH=11 samples
6. Thermal analysis data of Zn<sub>2</sub>Al-Cl55 sample
7. XRD patterns of Mg<sub>2</sub>Al-NAC samples obtained at different synthetic parameters
8. FTIR and Raman spectra of Mg<sub>2</sub>Al-NAC and Mg<sub>2</sub>Al-Cl samples
9. <sup>13</sup>C-CPMAS NMR spectra of NAC and Mg<sub>2</sub>Al-NAC sample
10. Kinetic models applied to the of NAC from Zn<sub>2</sub>Al-NAC55 sample

## 1. XRD patterns of LDH-NAC samples and NAC polymorphs

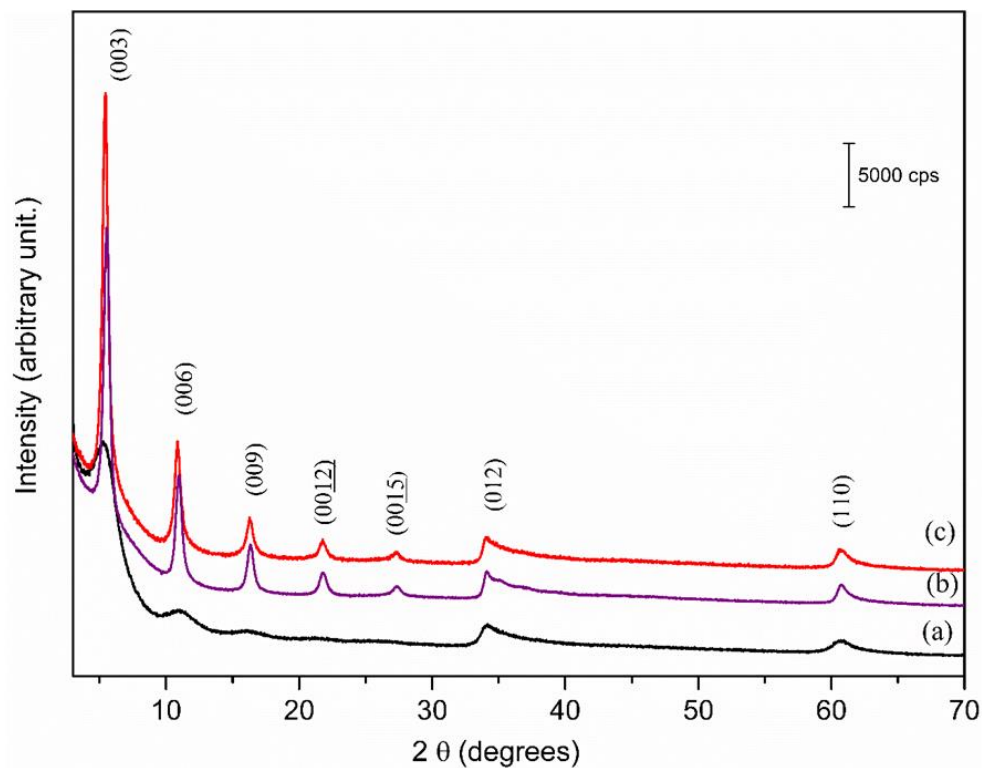

**Figure S1.** XRD patterns of LDH-NAC synthesized under distinct experimental conditions: (a)  $\text{Zn}_2\text{Al-NAC}$  (room temperature and NAC/Al molar ratio =1), (b)  $\text{Zn}_2\text{Al-NAC55}$  (55 °C and NAC/Al molar ratio =1), and (c)  $\text{Zn}_2\text{Al-1.3NAC55}$  (55 °C and NAC/Al molar ratio =1.3).

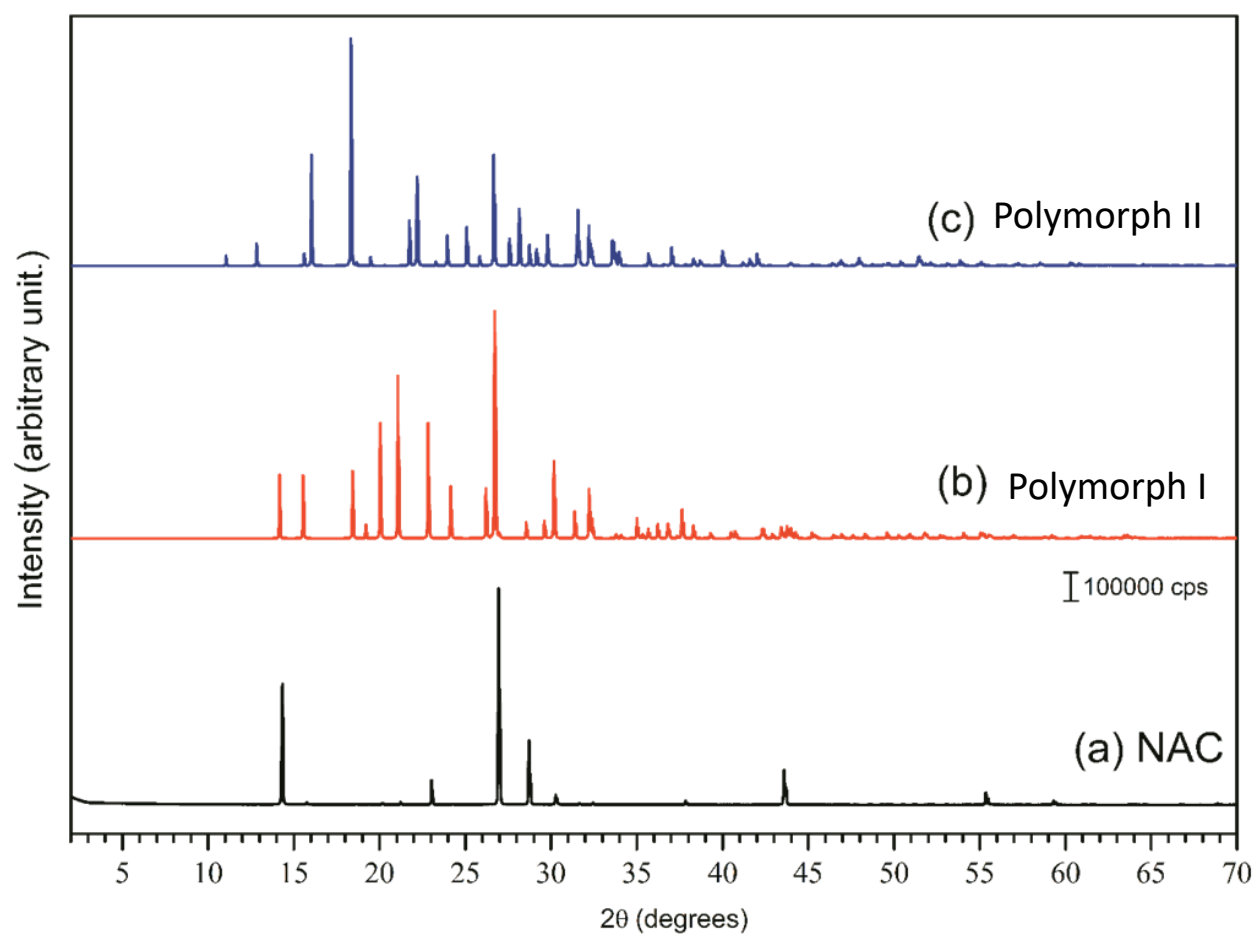

**Figure S2.** Comparison between XRD patterns of (a) NAC used in this work, (b) Polymorph I and (c) Polymorph II.

## 2. Crystal structure of NAC polymorphs obtained by XRD

Polymorph I structure comprises intermolecular interactions between  $\text{NH}\cdots\text{S}$  (2.82 Å),  $\text{OCOH}\cdots\text{O}=\text{C}$  (1.65 Å), and  $\text{CH}\cdots\text{OCOH}$  (2.72 Å), and intramolecular interaction between  $\text{NH}\cdots\text{OCOH}$  (2.26 Å).<sup>1</sup> Polymorph II shows intermolecular interactions of  $\text{NH}\cdots\text{S}$  (2.97 Å),  $\text{OCOH}\cdots\text{O}=\text{C}$  (1.66 Å), and  $\text{CH}\cdots\text{OCOH}$  (2.36 Å) and  $\text{SH}\cdots\text{OCOH}$  (2.15 Å). NAC used in this work is the polymorph I.

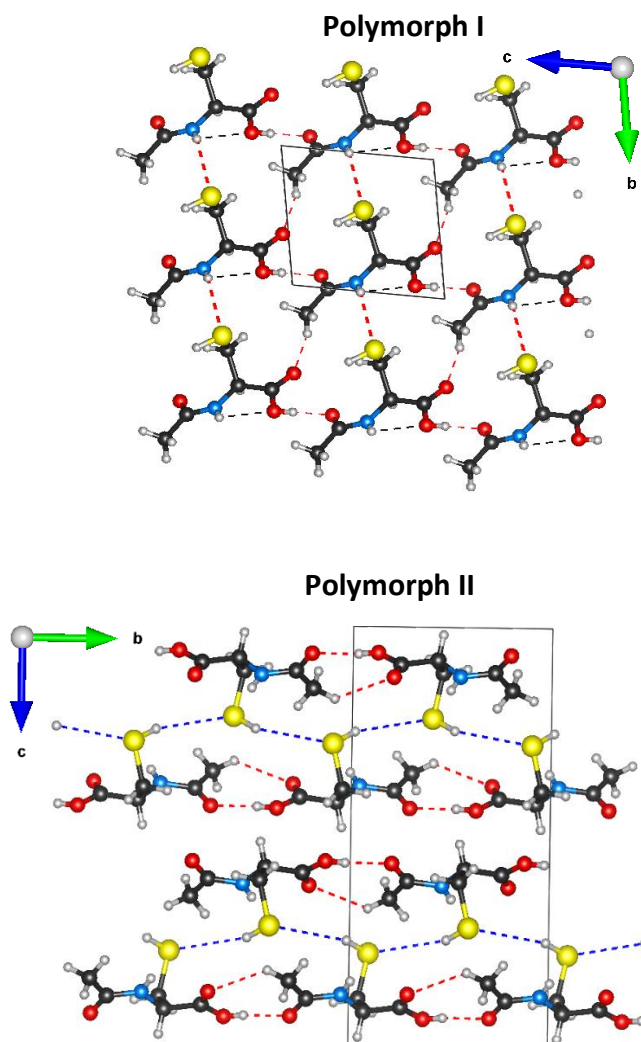

**Figure S3.** Crystalline packaging of polymorphs I and II, obtained in the Vesta version 3 program, from the crystallographic data deposited at Cambridge Crystallographic Data Centre by Kumar e Nagia [1].

### 3. Speciation curves for NAC species relative to pH value

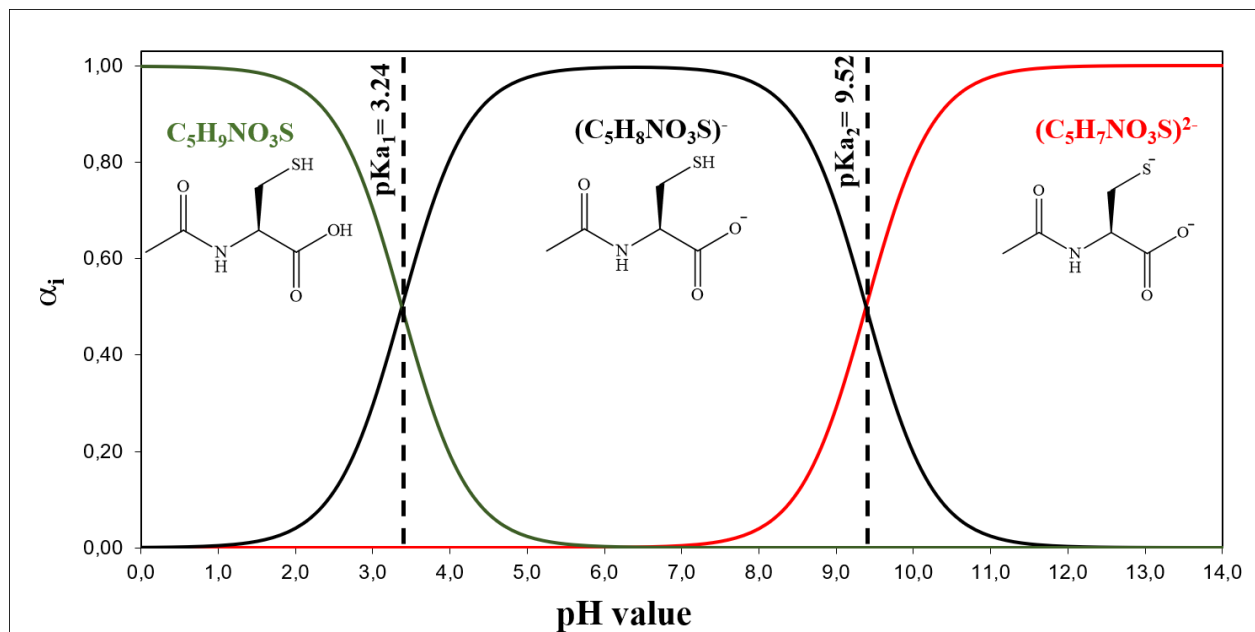

**Figure S4.** Curves of distribution of NAC species, where  $\alpha_i$  is the species fraction, obtained through the *CurTiPOt* program, developed by Prof. Dr. Ivano G. R. Gutz, from Instituto de Química - USP.

#### 4. FTIR and FT-Raman spectra of NAC samples obtained by freeze-drying of solutions in different pH values

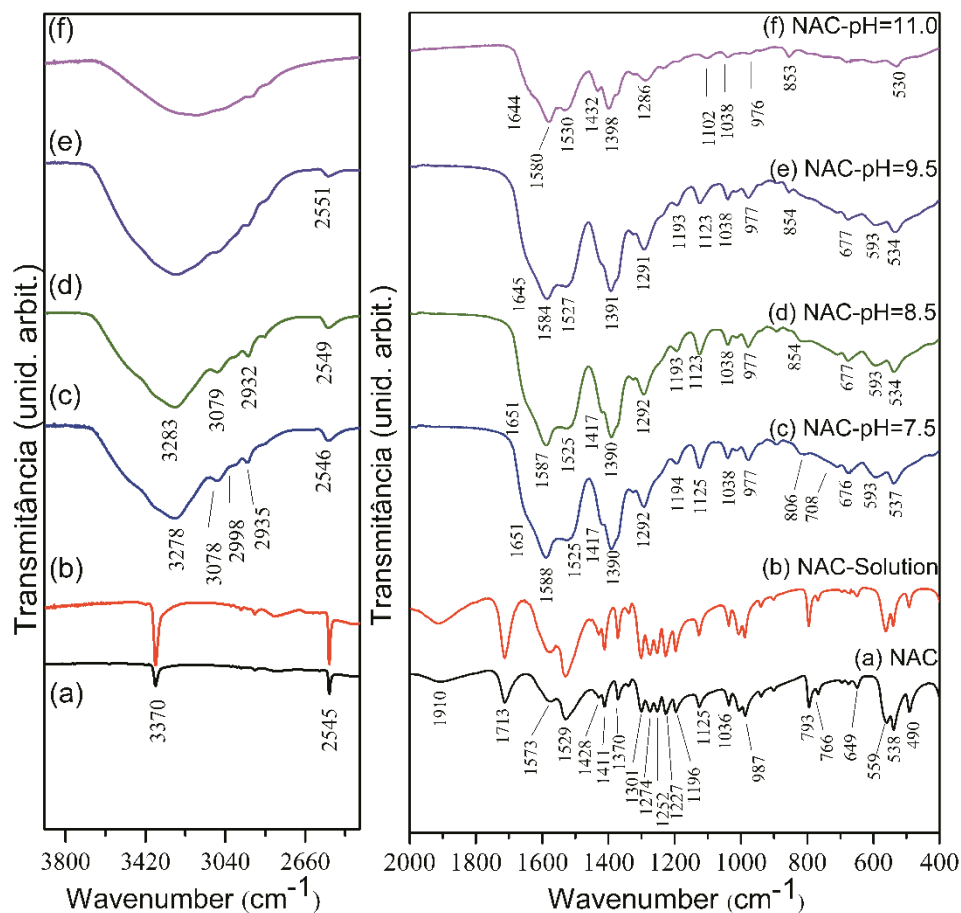

**Figure S5.** FTIR spectra of (a) NAC, (b) NAC dissolved in water and posteriorly freeze-dried, (c) NAC-pH=7.5, (d) NAC-pH=8.5, (e) NAC-pH=9.5, and (f) NAC-pH=11.

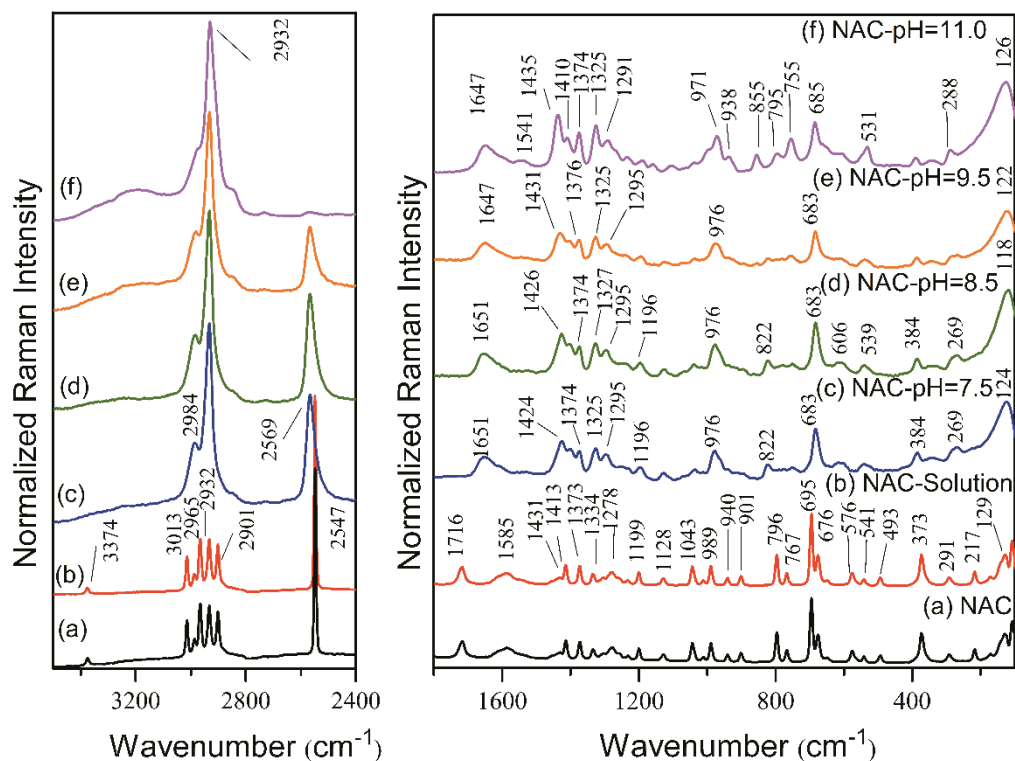

**Figure S6.** FT-Raman spectra of (a) NAC, (b) NAC dissolved in water and posteriorly freeze-dried, (c) NAC-pH=7.5, (d) NAC-pH=8.5, (e) NAC-pH=9.5, and (f) NAC-pH=11.

**Table S1.** IR and Raman band positions (in  $\text{cm}^{-1}$ ) of NAC (polymorph I), NAC-pH=11.0,  $\text{Zn}_2\text{Al}$ -NAC55 and their tentative assignment.

| NAC  |                     | NAC-pH=11 |       | $\text{Zn}_2\text{Al}$ -NAC55 |       | Tentative assignment                    |
|------|---------------------|-----------|-------|-------------------------------|-------|-----------------------------------------|
| FTIR | Raman               | FTIR      | Raman | FTIR                          | Raman |                                         |
| 3370 | 3374                |           |       |                               |       | $\nu$ N-H                               |
|      |                     |           |       | 3322                          |       | $\nu$ O-H                               |
|      | 3013                |           |       |                               |       | $\nu_{\text{as}}$ C-H ( $\text{CH}_3$ ) |
|      | 2965                |           |       |                               |       | $\nu_{\text{as}}$ C-H ( $\text{CH}_2$ ) |
|      | 2932                | 2932      | 2932  |                               |       | $\nu_{\text{s}}$ C-H ( $\text{CH}_3$ )  |
|      | 2901                |           |       |                               | 2932  | $\nu_{\text{s}}$ C-H ( $\text{CH}_2$ )  |
| 2545 | 2547                |           |       |                               |       | $\nu$ S-H                               |
| 1713 | 1716                |           |       |                               |       | $\nu$ C=O ( $\text{COOH}$ )             |
|      |                     |           |       | 1628                          |       | $\delta$ $\text{H}_2\text{O}$           |
| 1573 | 1585 <sup>(b)</sup> | 1644      | 1647  |                               |       | $\nu$ C=O (amide)                       |
|      |                     | 1580      |       | 1574                          |       | $\nu_{\text{as}}$ $\text{COO}^-$        |
| 1529 |                     | 1525      |       | 1528                          |       | $\delta$ N-H                            |
|      |                     |           |       |                               | 1429  | $\delta$ $\text{CH}_2$                  |
|      |                     | 1398      |       | 1394                          | 1399  | $\nu_{\text{s}}$ $\text{COO}^-$         |
| 1274 | 1278                | 1286      | 1291  | 1292                          | 1287  | $\nu$ C-N                               |
|      | 695                 | 680(w)    | 685   |                               | 683   | $\nu$ C-S                               |
|      |                     |           |       |                               | 124   | $\delta$ O-Zn-O                         |

a)  $\nu$  = stretching,  $\delta$  = bending, s = symmetric, as = antisymmetric

b) (b) = broad; (w) = weak



## 5. Thermal analysis data of NAC and NAC-pH=11 samples

NAC melts at 120°C (endothermic peak) and decomposes in two main events (**Figure S7**). XRD pattern of NAC used in this work is assigned to the polymorph I. The first event has a  $T_{\text{initial}}$  value equal to 130 °C (DTG peaks at 198 and 216 °C) and the second equal to 440 °C (DTG peak at 559 °C); in both events occur the loss of H<sub>2</sub>O, CO<sub>2</sub>, and SO<sub>2</sub> molecules. No residue is noticed after the sample heated up to 1000 °C.

The thermal analysis data of NAC-pH=11 sample shows the loss of hydration water molecules from room temperature up to about 200 °C, followed by the decomposition step ( $T_{\text{initial}}$ = 220 °C, DTG peak at 252 °C) (**Figure S7**). The release of CO<sub>2</sub> above 700 °C indicates the formation of an intermediate carbon species.

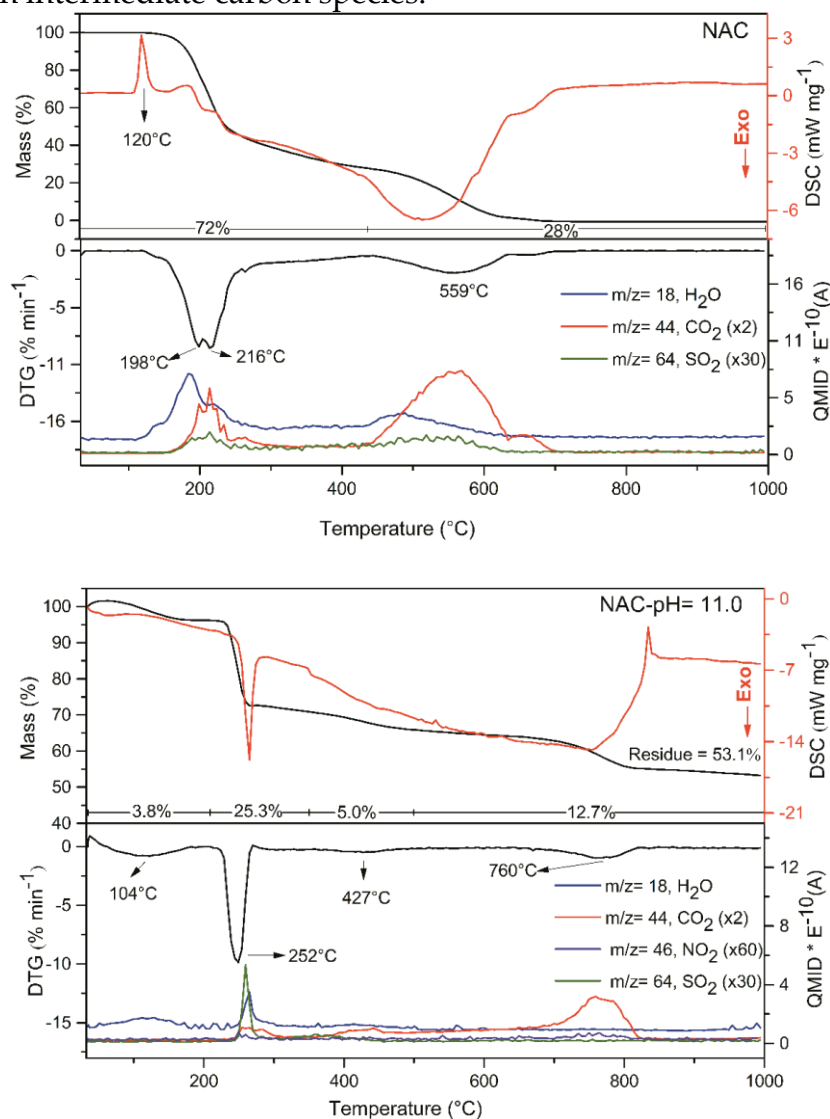

**Figure S7.** TG/DSC and DTG-MS curves of NAC polymorph I (top) and NAC-pH=11 samples (down).

## 6. Thermal analysis data of Zn<sub>2</sub>Al-Cl55 sample

The assignment of the events occurring in the thermal decomposition of Zn<sub>2</sub>Al-Cl (shown in **Figure S8**) was previously reported [2]. The amount of HCl released from dehydrochlorination is low and could not be identified in the experimental conditions applied in this work.

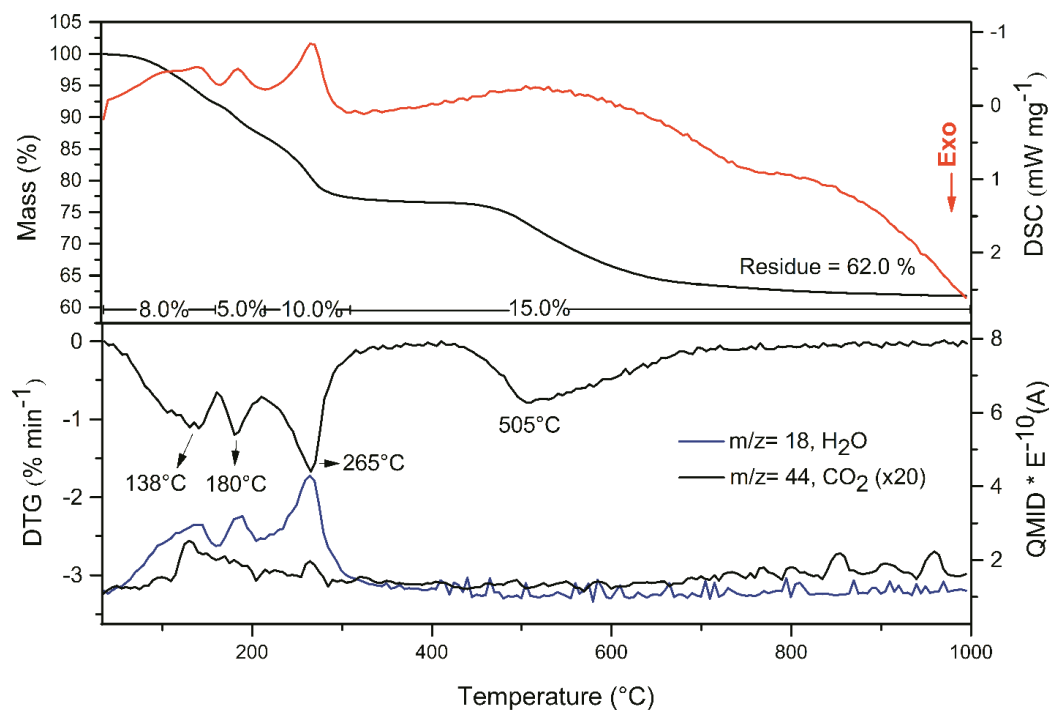

**Figure S8.** TG/DSC and DTG-MS curves of Zn<sub>2</sub>Al-Cl<sub>55</sub> sample under atmospheric air.

## 7. XRD patterns of Mg<sub>2</sub>Al-NAC samples obtained at different synthetic parameters

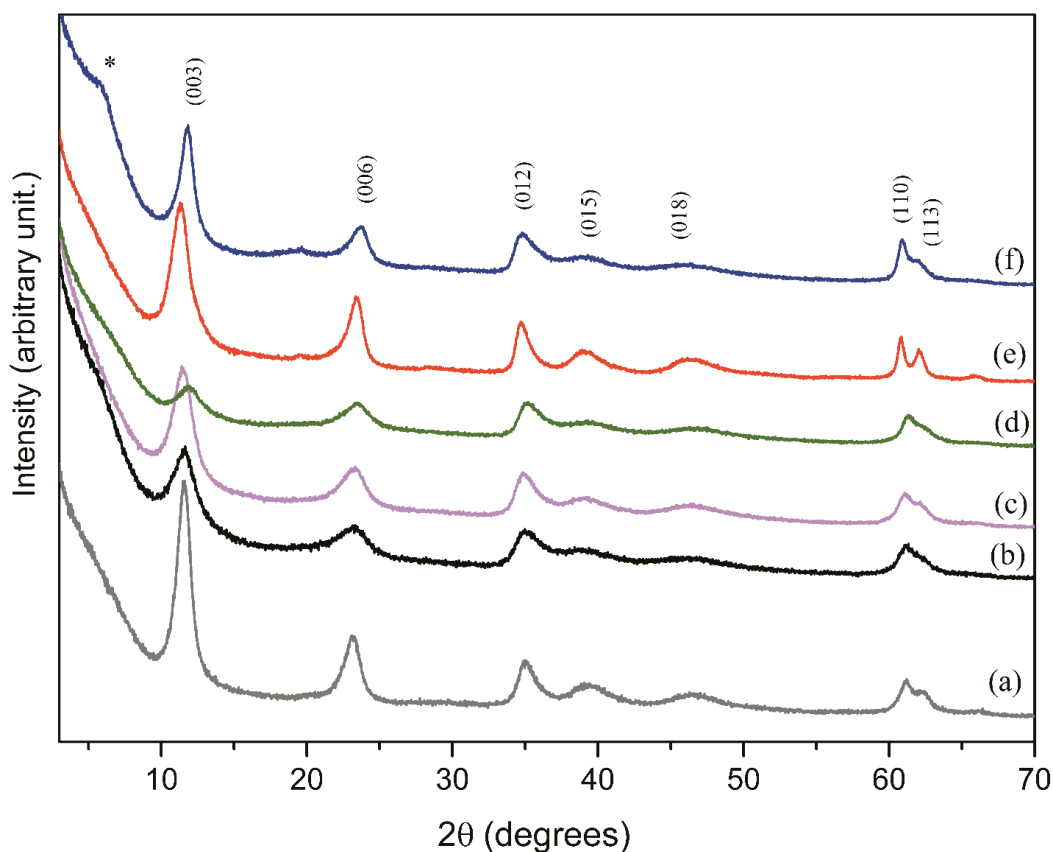

**Figure S9.** XRD patterns of (a) Mg<sub>2</sub>Al-Cl (b) Mg<sub>2</sub>Al-NAC (synthesis described in the Experimental section), (c) Mg<sub>2</sub>Al-0.5NAC (NAC/Al<sup>3+</sup> molar ratio used in the synthesis = 0.5), (d) Mg<sub>2</sub>Al-2NAC (NAC/Al<sup>3+</sup> molar ratio used in the synthesis = 2) (e) Mg<sub>2</sub>Al-NAC\_90\_24h (aging process at 90°C for 24 h) and (f) Mg<sub>2</sub>Al-NAC55 (synthesis described in Experimental section). (\*) equipment artefact.

## 8. FTIR and Raman spectra of $\text{Mg}_2\text{Al}$ -NAC and $\text{Mg}_2\text{Al}$ -Cl samples

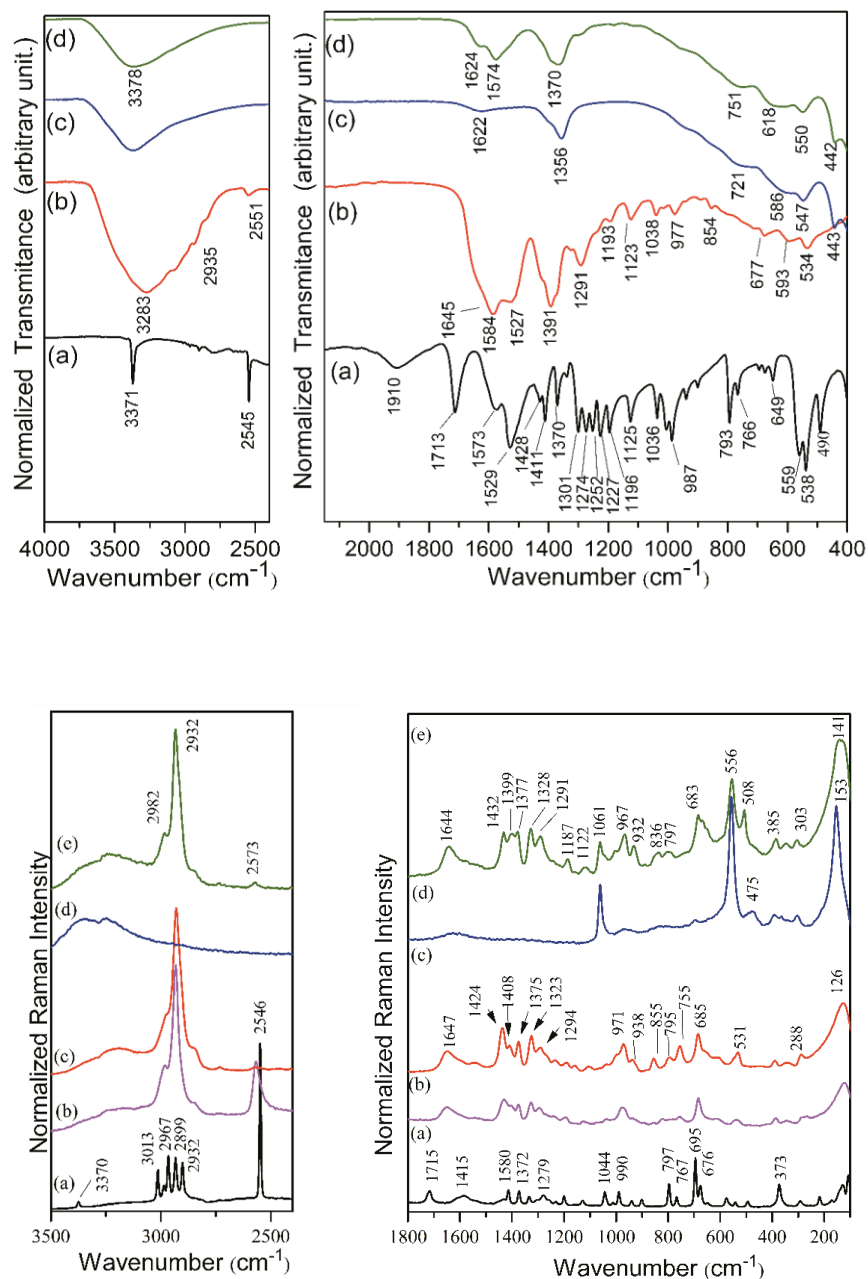

**Figure S10.** FTIR spectra (top) of (a) NAC, (b) NAC-pH=9.5, (c)  $\text{Mg}_2\text{Al}$ -Cl and (d)  $\text{Mg}_2\text{Al}$ -NAC, and FT-Raman spectra (down) of (a) NAC, (b) NAC-pH=9.5, (c) NAC-pH=11.0, (d)  $\text{Mg}_2\text{Al}$ -Cl and (e)  $\text{Mg}_2\text{Al}$ -NAC.

## 9. $^{13}\text{C}$ -CPMAS NMR spectra of NAC and $\text{Mg}_2\text{Al}$ -NAC sample

As indicated in **Figure S11**, this work suggests that the resonance peak of the nuclei  $^{13}\text{C}$  in the oxidized NAC ( $\text{C}^*$ ) is shifted as follows:  $\text{C1}^*$  from 175.0 to 179.4 ppm,  $\text{C3}^*$  from 28.3 to 36.9 ppm,  $\text{C5}^*$  from 23.3 to 19.9 ppm. For the reduced NAC,  $\text{C1}$  peak (177.2 ppm) is located at the same value as that for  $\text{Zn}_2\text{Al}$ -NAC55 material (177.8 ppm), but  $\text{C2}$  and  $\text{C3}$  peaks are distinct due to the *thiol* group oxidation. Additionally, the peak at 170.7 ppm (marked as  $\text{C}^\#$  in  $\text{Mg}_2\text{Al}$ -NAC) is attributed to the LDH intercalated with carbonate ion [3] due to atmospheric  $\text{CO}_2$  contamination.

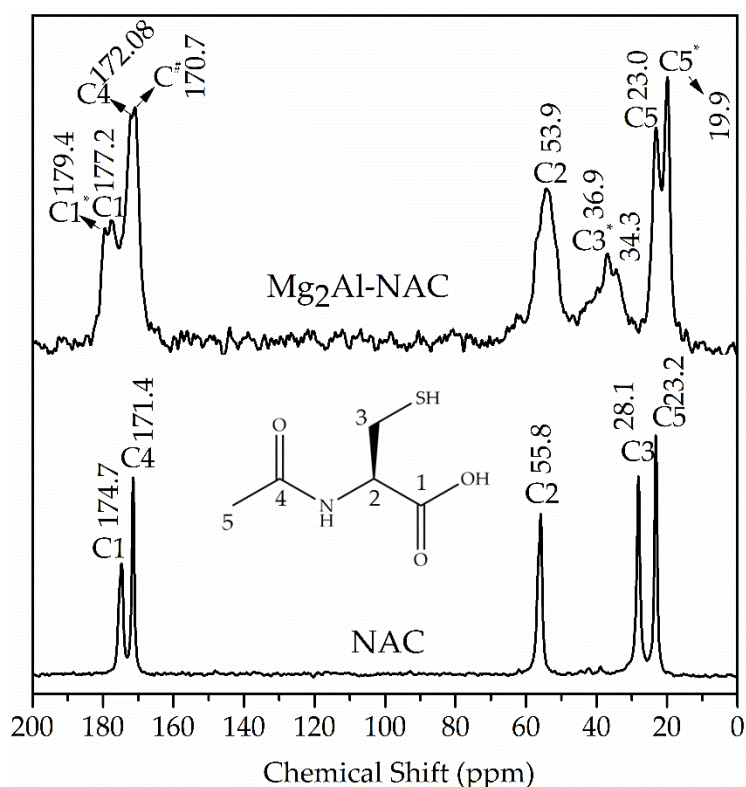

**Figure S11.**  $^{13}\text{C}$ -CPMAS NMR spectra of NAC and  $\text{Mg}_2\text{Al}$ -NAC samples.

## 10. Kinetic models applied to the Zn<sub>2</sub>Al-NAC55 sample

S1 method-Zero-order

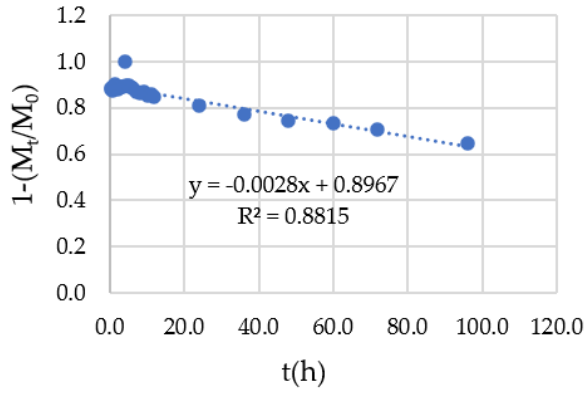

S2 method-Zero-order

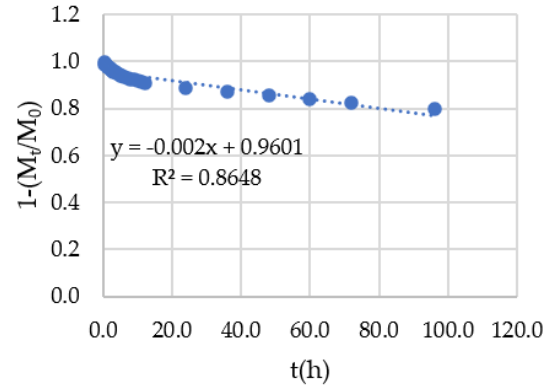

S1 method-First order

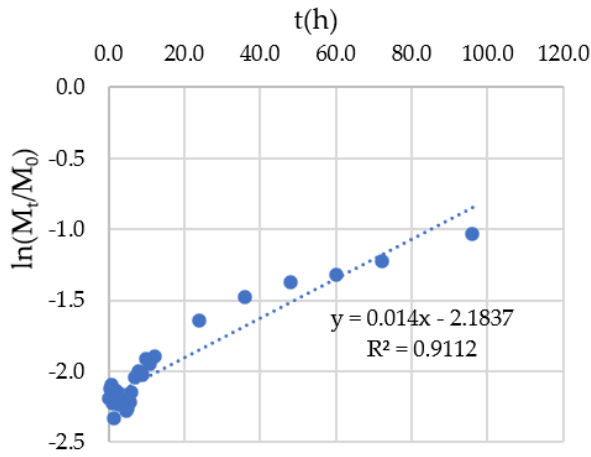

S2 method-First order

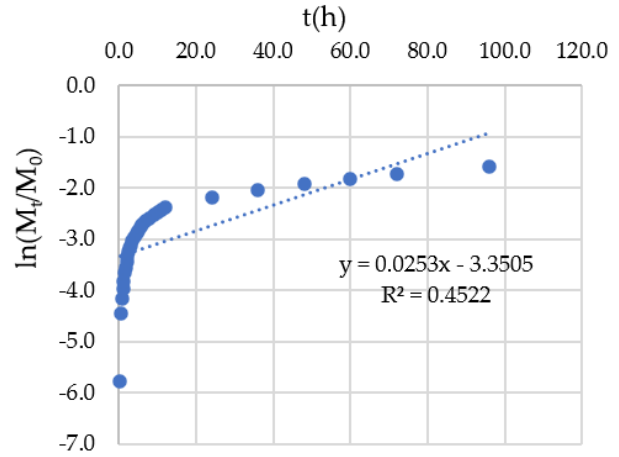

S1 method-Higuchi

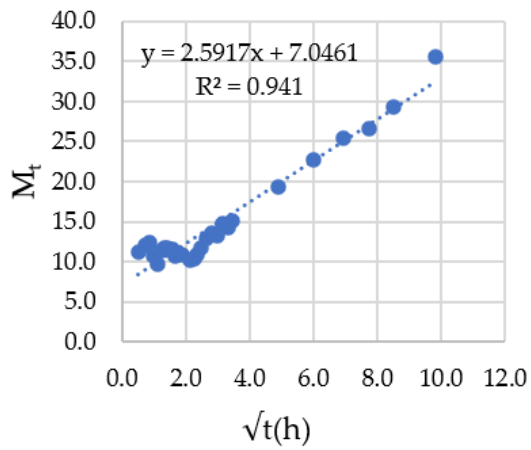

S2 method-Higuchi

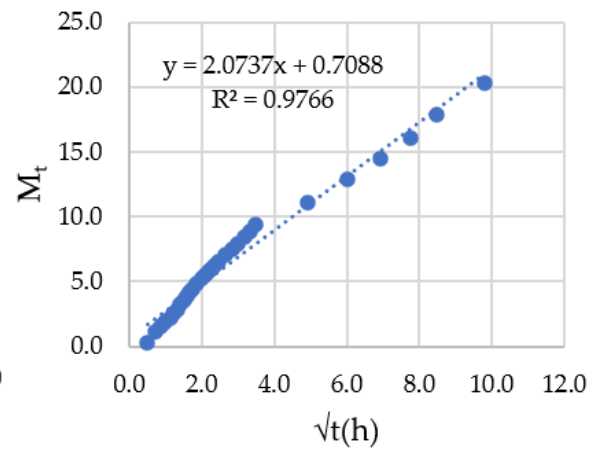

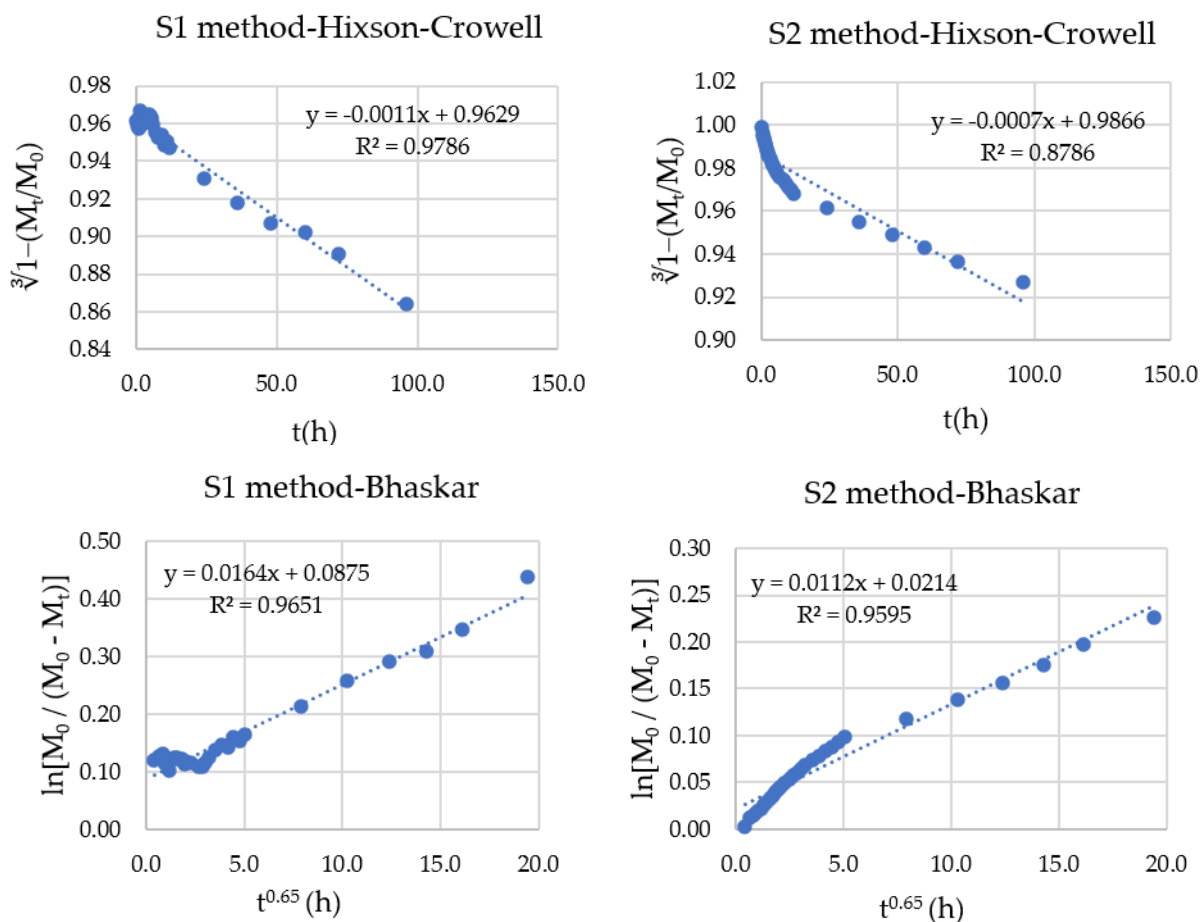

**Figure S12.** Kinetic models applied to the Zn<sub>2</sub>Al-NAC55 sample,  $M_t$  is the amount of NAC released at time  $t$  and  $M_0$  is the initial amount of NAC.

## REFERENCES

1. Kumar, S.S.; Nangia, A. A New Conformational Polymorph of N-Acetyl-l-Cysteine. The Role of S-H...O and C-H...O Interactions. *CrystEngComm* **2013**, *15*, 6498, doi:10.1039/c3ce40879e.
2. Cunha, V.R.R.; de Souza, R.B.; da Fonseca Martins, A.M.C.R.P.; Koh, I.H.J.; Constantino, V.R.L. Accessing the Biocompatibility of Layered Double Hydroxide by Intramuscular Implantation: Histological and Microcirculation Evaluation. *Sci. Rep.* **2016**, *6*, 30547, doi:10.1038/srep30547.
3. Olszówka, J.E.; Karcz, R.; Kry, J.; Napruszewska, B.D.; Sulikowski, B.; Socha, R.P.; Gawe, A. New Insight into the Preferred Valency of Interlayer Anions in Hydrotalcite-like Compounds: The effect of Mg / Al Ratio. *Appl. Clay Sci.* **2018**, *155*, 84–94, doi:10.1016/j.clay.2018.01.013.
